# Supplementary material for: Templated interfacial synthesis of metal-organic framework (MOF) nano- and micro-structures with precisely controlled shapes and sizes
Source: PubMed Central journal article supplement (PMC9814928; doi:10.1038/s42004-021-00522-1), 2021-06-03
Supplement: 42004_2021_522_MOESM1_ESM.pdf [file 42004_2021_522_MOESM1_ESM.pdf]

## Supplementary Information

### Templated Interfacial Synthesis of Metal-Organic Framework (MOF) Nano- and Micro-Structures with Precisely Controlled Shapes and Sizes

Lingyao Meng,<sup>1</sup>Binyu Yu<sup>2</sup> and Yang Qin<sup>1,2</sup> \*

<sup>1</sup> Department of Chemistry and Chemical Biology, University of New Mexico, Albuquerque, NM 87131, USA

<sup>2</sup> Department of Chemical and Biomolecular Engineering, Institute of Materials Science, University of Connecticut, CT 06269, USA

\* Corresponding Author; E-mail: [yang.qin@uconn.edu](mailto:yang.qin@uconn.edu)

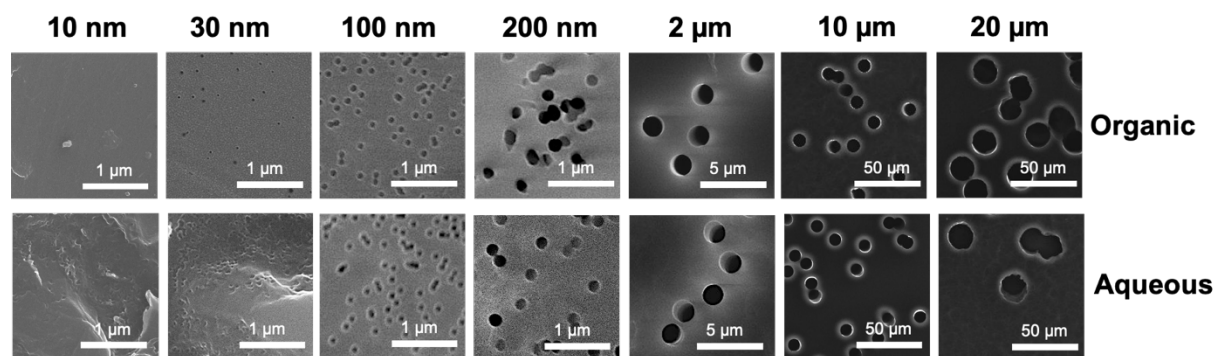

**Figure S1:** Scanning electron microscopy (SEM) images of both surfaces of pristine track-etched polycarbonate (PCTE) membranes with different pore sizes applied for the templated interfacial synthesis in the current studies. The terms “organic” and “aqueous” indicate surfaces in contact with 1-octanol and water solutions during synthesis, respectively.

**Table S1.** Manufactory specifications of the track-etched polycarbonate (PCTE) membranes.

| Pore Diameter    | Thickness ( $\mu\text{m}$ ) | Pore Density (pores/ $\text{cm}^2$ ) | Open Area (%) |
|------------------|-----------------------------|--------------------------------------|---------------|
| 10 nm            | 6                           | $6 \times 10^8$                      | < 1           |
| 30 nm            | 6                           | $6 \times 10^8$                      | <1            |
| 100 nm           | 6                           | $4 \times 10^8$                      | 3             |
| 200 nm           | 10                          | $3 \times 10^8$                      | 10            |
| 2 $\mu\text{m}$  | 10                          | $2 \times 10^6$                      | 6             |
| 10 $\mu\text{m}$ | 10                          | $1 \times 10^5$                      | 8             |
| 20 $\mu\text{m}$ | 3                           | $4 \times 10^4$                      | 13            |

**Table S2.** Reaction conditions for the synthesis of ZIF-8 and ZIF-67 nano- and micro-structures.

| <i>ZIF-8/Pore Size</i>  | <i>[Zn<sup>2+</sup>] Conc. (M)</i> | <i>[2-MIM] Conc. (M)</i> | <i>Reaction Time (h)</i> |
|-------------------------|------------------------------------|--------------------------|--------------------------|
| 10 nm                   | 0.06                               | 1                        | 4                        |
| 30 nm                   | 0.025                              | 1                        | 1                        |
| 100 nm                  | 0.042                              | 2                        | 1                        |
| 200 nm                  | 0.025                              | 0.5                      | 4                        |
| 2 μm                    | 0.1                                | 2                        | 4                        |
| 10 μm                   | 0.025                              | 1                        | 4                        |
| 20 μm                   | 0.025                              | 2                        | 4                        |
| <i>ZIF-67/Pore Size</i> | <i>[Co<sup>2+</sup>] Conc. (M)</i> | <i>[2-MIM] Conc. (M)</i> | <i>Reaction Time (h)</i> |
| 10 nm                   | 0.042                              | 2                        | 4                        |
| 30 nm                   | 0.025                              | 0.75                     | 1                        |
| 100 nm                  | 0.06                               | 2                        | 1                        |
| 200 nm                  | 0.06                               | 2                        | 4                        |
| 2 μm                    | 0.1                                | 2                        | 4                        |
| 10 μm                   | 0.06                               | 1                        | 6                        |
| 20 μm                   | 0.1                                | 2                        | 6                        |

**Table S3.** Crystallographic preferred orientation (CPO) indices for different sizes of MOF nanostructures.

| <i>ZIF-8/Pore Size</i>  | <i>CPO (002)/(011)</i> | <i>CPO (002)/(112)</i> |
|-------------------------|------------------------|------------------------|
| 10 nm                   | 6.17                   | 1.26                   |
| 30 nm                   | 5.25                   | 1.51                   |
| 100 nm                  | 7.09                   | 1.96                   |
| 200 nm                  | 5.64                   | 1.38                   |
| 2 μm                    | 6.14                   | 1.27                   |
| 10 μm                   | 7.34                   | 1.45                   |
| 20 μm                   | 7.55                   | 1.98                   |
| <i>ZIF-67/Pore Size</i> | <i>CPO (002)/(011)</i> | <i>CPO (002)/(112)</i> |
| 10 nm                   | 11.28                  | 2.05                   |
| 30 nm                   | 9.20                   | 2.78                   |
| 100 nm                  | 10.02                  | 2.13                   |
| 200 nm                  | 9.49                   | 2.21                   |
| 2 μm                    | 7.78                   | 2.46                   |
| 10 μm                   | 10.60                  | 2.08                   |
| 20 μm                   | 7.89                   | 1.79                   |

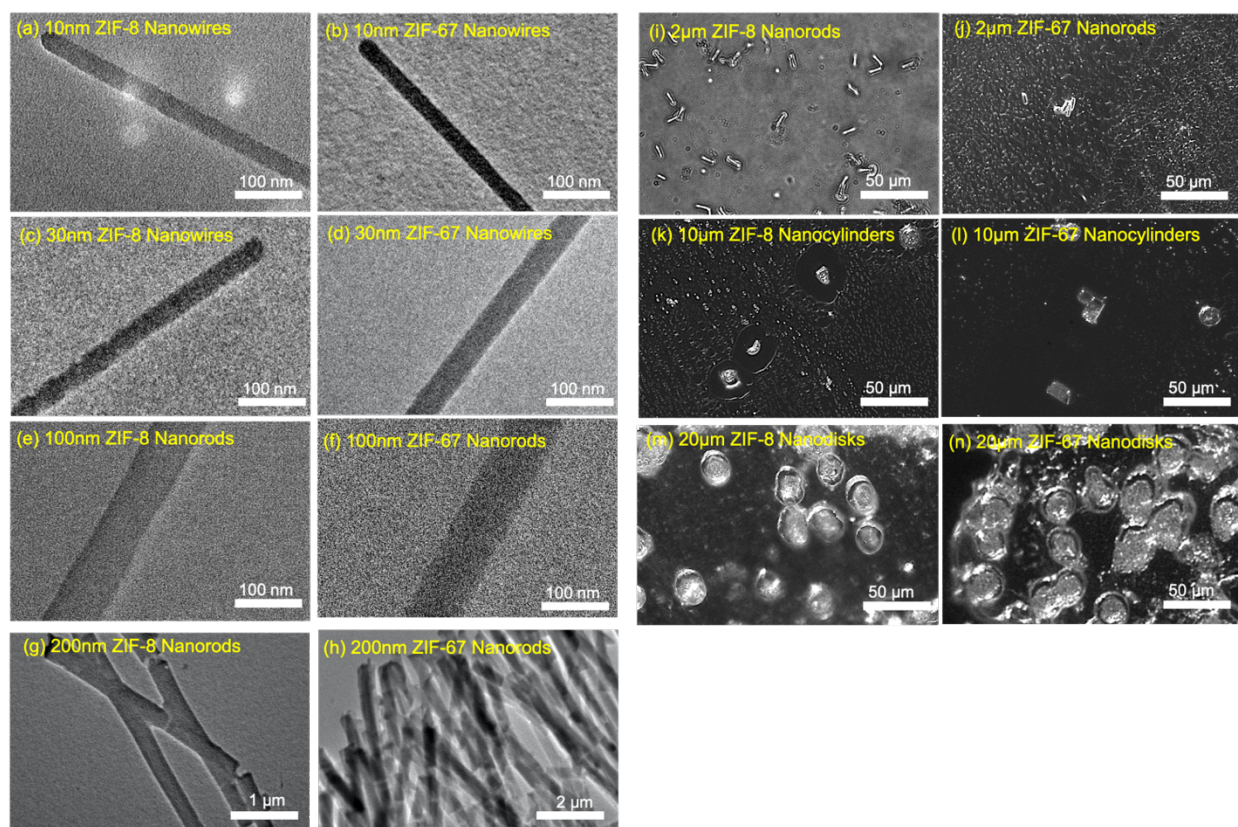

**Figure S2.** (a)-(h) Transmission electron microscopy (TEM) images of ZIF-8 and ZIF-67 nanowires and nanorods formed within 10 nm, 30 nm, 100 nm and 200 nm pores of corresponding PCTE templates; (i)-(n) optical microscopic images of ZIF-8 and ZIF-67 micro-rods, micro-cylinders, and micro-disks formed respectively in 2 μm, 10 μm, and 20 μm pores of corresponding PCTE templates.

**Table S4.** Template pore diameters, ZIF structure diameters and lengths sampled and averaged from 100 individual subjects of dissolved structures.

| <i>Structure</i> | <i>Template pore diameter</i> | <i>Diameter</i>   | <i>Length</i>   |
|------------------|-------------------------------|-------------------|-----------------|
| 10 nm ZIF-8      | N/A                           | 18.33 ± 2.51 nm   | 1.74 ± 0.26 μm  |
| 30 nm ZIF-8      | 26.48 ± 4.79 nm               | 30.53 ± 2.24 nm   | 1.65 ± 0.69 μm  |
| 100 nm ZIF-8     | 84.24 ± 12.96 nm              | 112.51 ± 14.30 nm | 2.39 ± 0.91 μm  |
| 200 nm ZIF-8     | 197.62 ± 16.23 nm             | 197.25 ± 24.52 nm | 2.60 ± 0.66 μm  |
| 2 μm ZIF-8       | 1.67 ± 0.12 μm                | 1.58 ± 0.16 μm    | 7.56 ± 0.59 μm  |
| 10 μm ZIF-8      | 8.13 ± 0.84 μm                | 7.24 ± 1.07 μm    | 10.67 ± 2.48 μm |
| 20 μm ZIF-8      | 19.14 ± 1.67 μm               | 19.22 ± 1.45 μm   | 2.38 ± 0.60 μm  |
| 10 nm ZIF-67     | N/A                           | 24.01 ± 2.62 nm   | 1.78 ± 0.70 μm  |
| 30 nm ZIF-67     | 26.48 ± 4.79 nm               | 28.86 ± 2.71 nm   | 1.38 ± 0.39 μm  |
| 100 nm ZIF-67    | 84.24 ± 12.96 nm              | 76.01 ± 7.63 nm   | 1.98 ± 0.37 μm  |
| 200 nm ZIF-67    | 197.62 ± 16.23 nm             | 204.18 ± 17.26 μm | 4.02 ± 0.63 μm  |
| 2 μm ZIF-67      | 1.67 ± 0.12 μm                | 1.76 ± 0.13 μm    | 6.92 ± 0.48 μm  |
| 10 μm ZIF-67     | 8.13 ± 0.84 μm                | 8.20 ± 0.79 μm    | 9.63 ± 2.37 μm  |
| 20 μm ZIF-67     | 19.14 ± 1.67 μm               | 18.94 ± 1.35 μm   | 2.88 ± 0.52 μm  |

**Table S5.** Synthesis condition optimization for ZIF-7 nano-structures using PCTE templates with 100 nm pore sizes. BIM: benzimidazole. Zn(NO<sub>3</sub>)<sub>2</sub> is the Zn<sup>2+</sup> source.

| <i>Attempts</i> | <i>[Zn<sup>2+</sup>] Conc. (M)</i> | <i>[BIM] Conc. (M)</i> | <i>Reaction Time (h)</i> |
|-----------------|------------------------------------|------------------------|--------------------------|
| (a)             | 0.236                              | 1                      | 4                        |
| (b)             | 0.236                              | 2                      | 4                        |
| (c)             | 0.236                              | 3                      | 4                        |

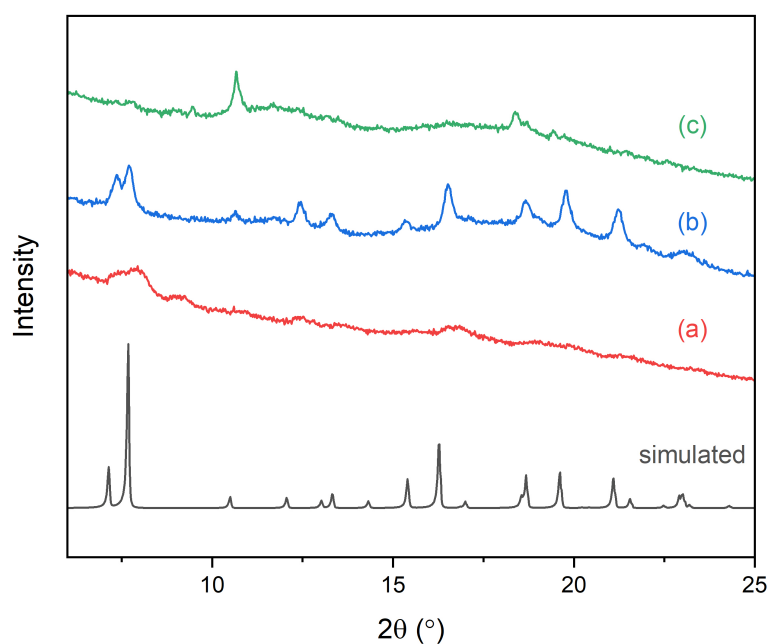

**Figure S3.** PXRD profiles of post-synthesis templates using conditions listed in Table S5.



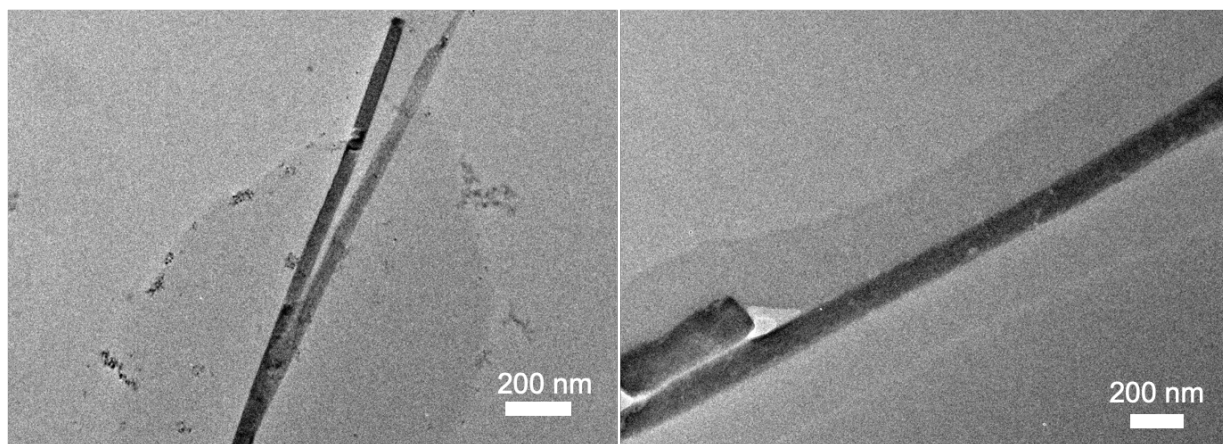

**Figure S4.** TEM images of isolated ZIF-7 nanostructures from reaction conditions (b) in Table S5.

**Table S6.** Synthesis condition optimization for ZIF-8 nano-structures using PCTE templates with 10 nm pore sizes. 2-MIM: 2-Methylimidazole.  $\text{Zn}(\text{NO}_3)_2$  is the  $\text{Zn}^{2+}$  source.

| <i>Attempts</i> | <i>[Zn<sup>2+</sup>] Conc. (M)</i> | <i>[2-MIM] Conc. (M)</i> | <i>Reaction Time (h)</i> |
|-----------------|------------------------------------|--------------------------|--------------------------|
| (a)             | 0.025                              | 1                        | 4                        |
| (b)             | 0.06                               | 1                        | 4                        |
| (c)             | 0.025                              | 2                        | 4                        |

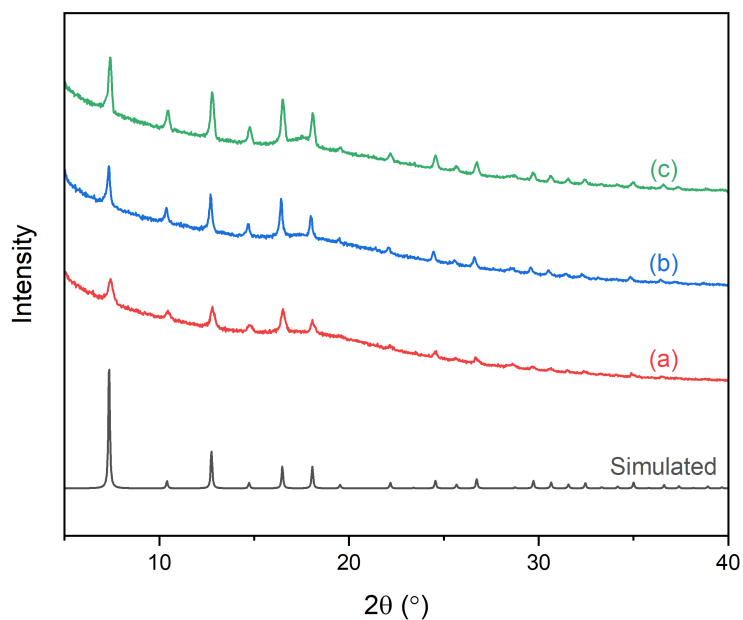

**Figure S5.** PXRD profiles of post-synthesis templates using conditions listed in Table S6.

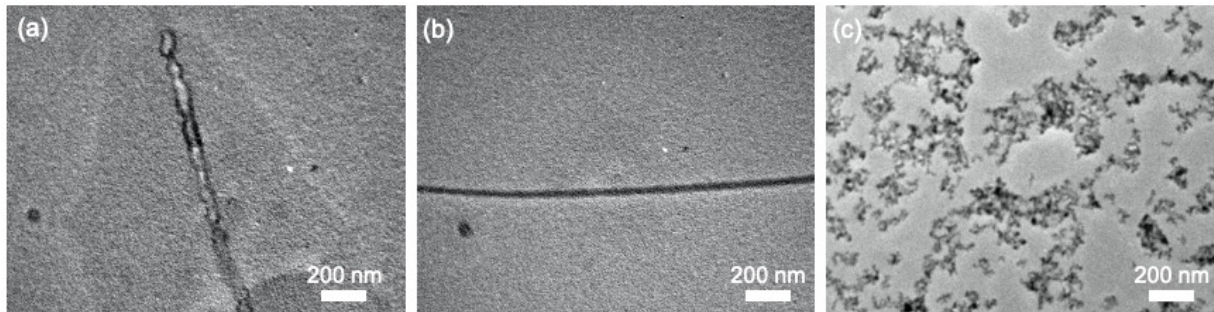

**Figure S6.** TEM images of isolated ZIF-8 10 nm nano-structures from reaction conditions (a)-(c) in Table S6.

**Table S7.** Synthesis condition optimization for ZIF-8 nano-structures using PCTE templates with 200 nm pore sizes. 2-MIM: 2-Methylimidazole.  $\text{Zn}(\text{NO}_3)_2$  is the  $\text{Zn}^{2+}$  source.

| <i>Attempts</i> | <i>[Zn<sup>2+</sup>] Conc. (M)</i> | <i>[2-MIM] Conc. (M)</i> | <i>Reaction Time (h)</i> |
|-----------------|------------------------------------|--------------------------|--------------------------|
| (a)             | 0.025                              | 0.5                      | 4                        |
| (b)             | 0.025                              | 1                        | 4                        |
| (c)             | 0.025                              | 2                        | 4                        |

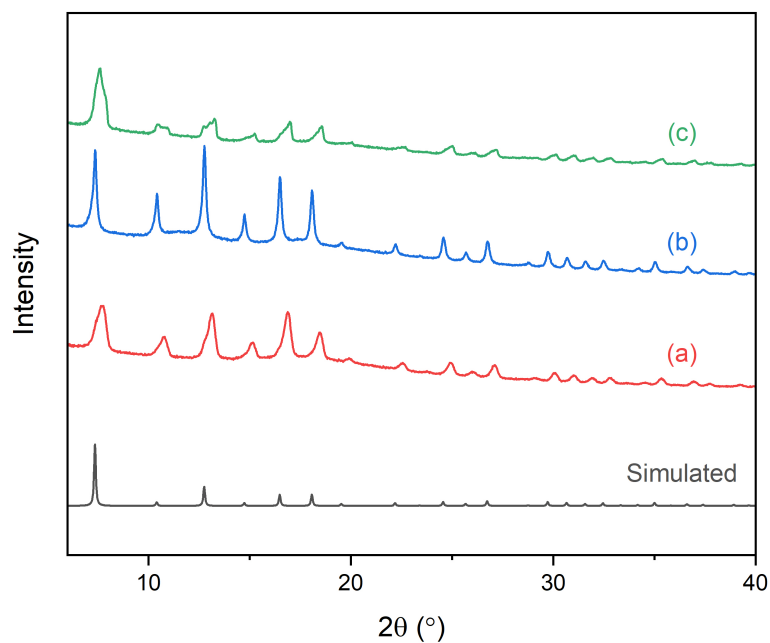

**Figure S7.** PXRD profiles of post-synthesis templates using conditions listed in Table S7.

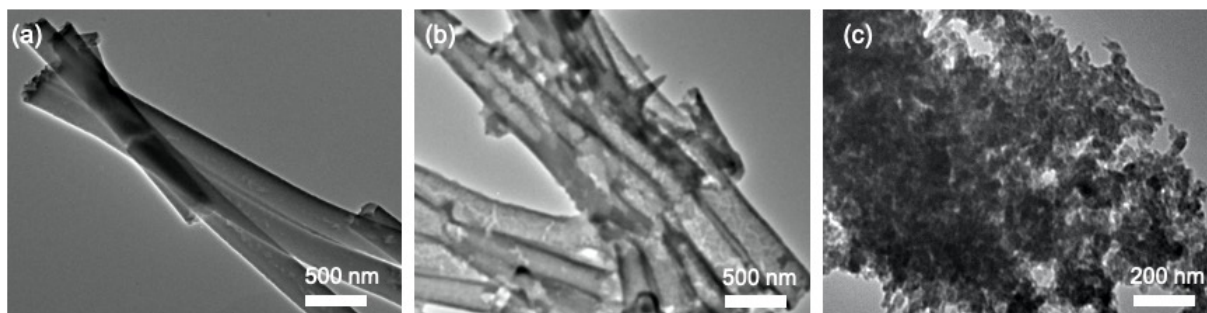

**Figure S8.** TEM images of isolated ZIF-8 200 nm nano-structures from reaction conditions (a)-(c) in Table S7.

**Table S8.** Synthesis condition optimization for ZIF-8 micro-structures using PCTE templates with 2  $\mu\text{m}$  pore sizes. 2-MIM: 2-Methylimidazole.  $\text{Zn}(\text{NO}_3)_2$  is the  $\text{Zn}^{2+}$  source.

| <i>Attempts</i> | <i>[Zn<sup>2+</sup>] Conc. (M)</i> | <i>[2-MIM] Conc. (M)</i> | <i>Reaction Time (h)</i> |
|-----------------|------------------------------------|--------------------------|--------------------------|
| (a)             | 0.025                              | 1                        | 4                        |
| (b)             | 0.06                               | 1                        | 4                        |
| (c)             | 0.1                                | 1                        | 4                        |
| (d)             | 0.5                                | 1                        | 4                        |
| (e)             | 1                                  | 1                        | 4                        |
| (f)             | 1.5                                | 1                        | 4                        |
| (g)             | 2                                  | 1                        | 4                        |
| (h)             | 0.025                              | 2                        | 4                        |
| (i)             | 0.06                               | 2                        | 4                        |
| (j)             | 0.1                                | 2                        | 4                        |
| (k)             | 0.5                                | 2                        | 4                        |

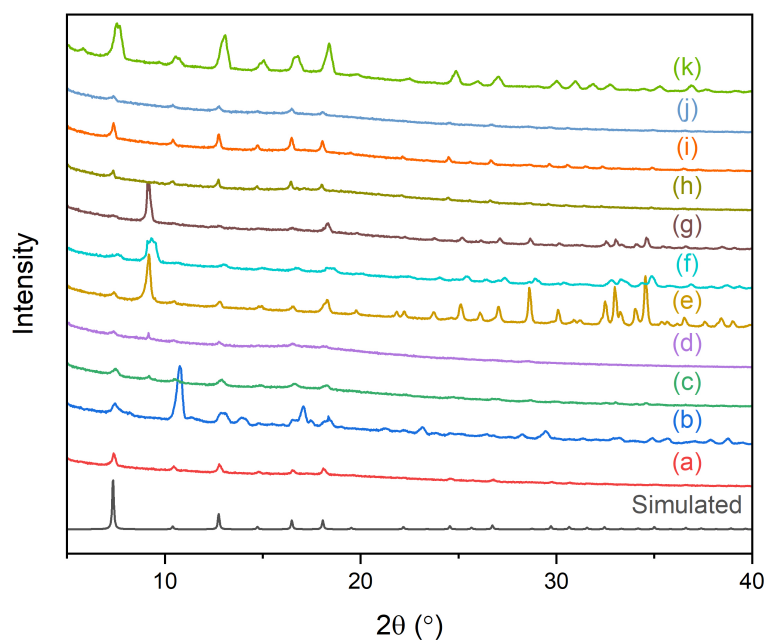

**Figure S9.** PXRD profiles of post-synthesis templates using conditions listed in Table S8.

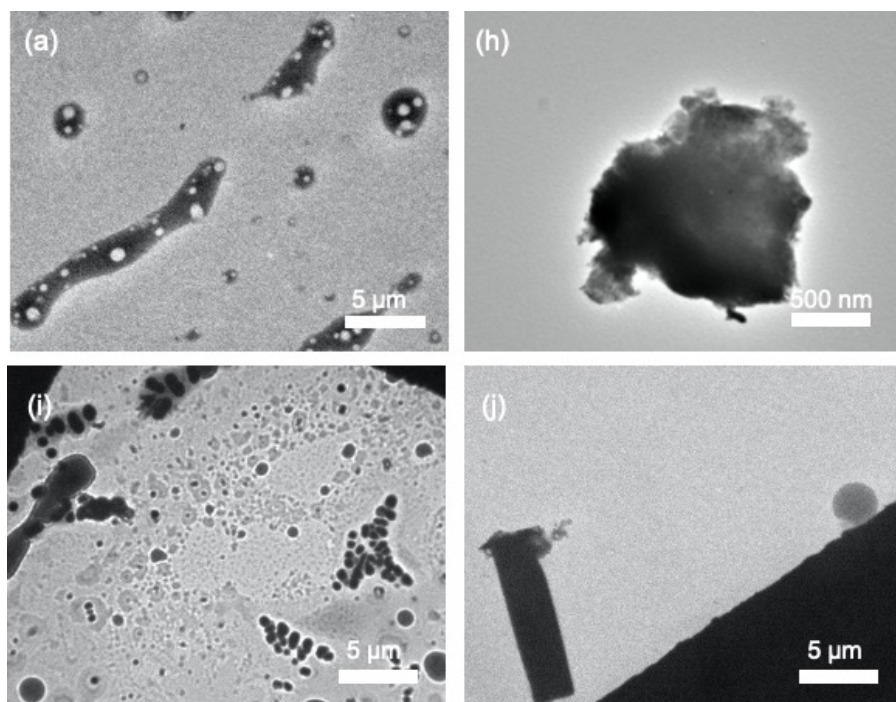

**Figure S10.** TEM images of isolated ZIF-8 2  $\mu\text{m}$  micro-structures from reaction conditions (a), (h), (i), (j) in Table S8.

**Table S9.** Synthesis condition optimization for ZIF-8 micro-structures using PCTE templates with 10  $\mu\text{m}$  pore sizes. 2-MIM: 2-Methylimidazole.  $\text{Zn}(\text{NO}_3)_2$  is the  $\text{Zn}^{2+}$  source.

| <i>Attempts</i> | <i>[Zn<sup>2+</sup>] Conc. (M)</i> | <i>[2-MIM] Conc. (M)</i> | <i>Reaction Time (h)</i> |
|-----------------|------------------------------------|--------------------------|--------------------------|
| (a)             | 0.025                              | 1                        | 4                        |
| (b)             | 0.06                               | 1                        | 4                        |
| (c)             | 0.1                                | 1                        | 4                        |
| (d)             | 0.5                                | 1                        | 4                        |
| (e)             | 1                                  | 1                        | 4                        |
| (f)             | 0.025                              | 2                        | 4                        |
| (g)             | 0.06                               | 2                        | 4                        |
| (h)             | 0.1                                | 2                        | 4                        |
| (i)             | 0.5                                | 2                        | 4                        |
| (j)             | 1                                  | 2                        | 4                        |

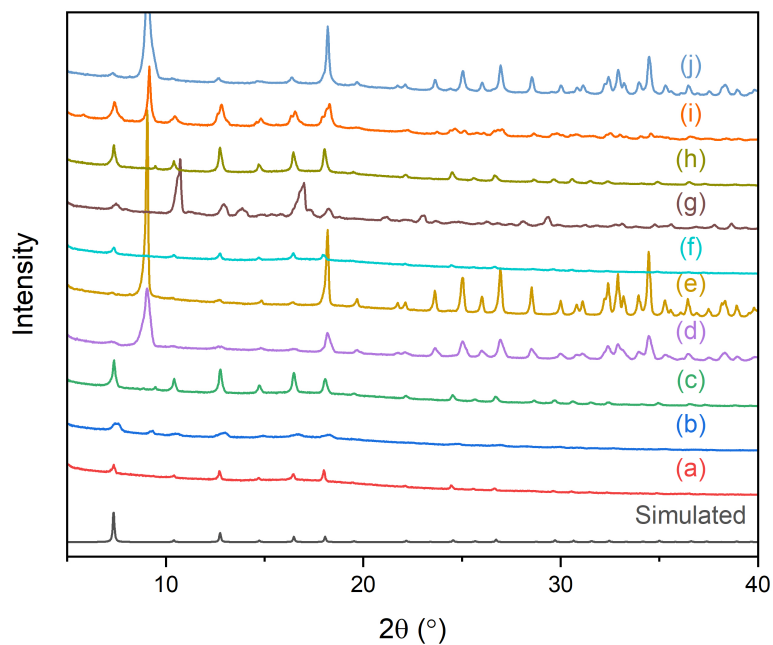

**Figure S11.** PXRD profiles of post-synthesis templates using conditions listed in Table S9.

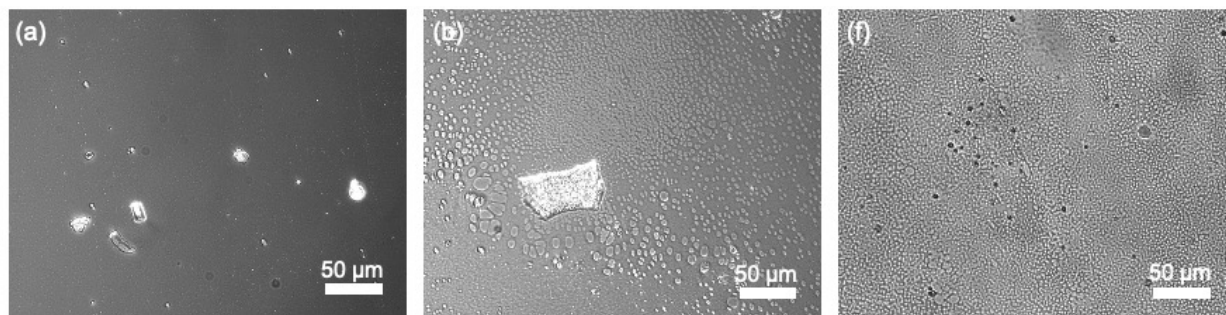

**Figure S12.** Optical microscopy images of isolated ZIF-8 10  $\mu\text{m}$  micro-structures from reaction conditions (a), (b), (f) in Table S9.

**Table S10.** Synthesis condition optimization for ZIF-8 micro-structures using PCTE templates with 20  $\mu\text{m}$  pore sizes. 2-MIM: 2-Methylimidazole.  $\text{Zn}(\text{NO}_3)_2$  is the  $\text{Zn}^{2+}$  source.

| <i>Attempts</i> | <i>[Zn<sup>2+</sup>] Conc. (M)</i> | <i>[2-MIM] Conc. (M)</i> | <i>Reaction Time (h)</i> |
|-----------------|------------------------------------|--------------------------|--------------------------|
| (a)             | 0.025                              | 1                        | 4                        |
| (b)             | 0.025                              | 2                        | 4                        |



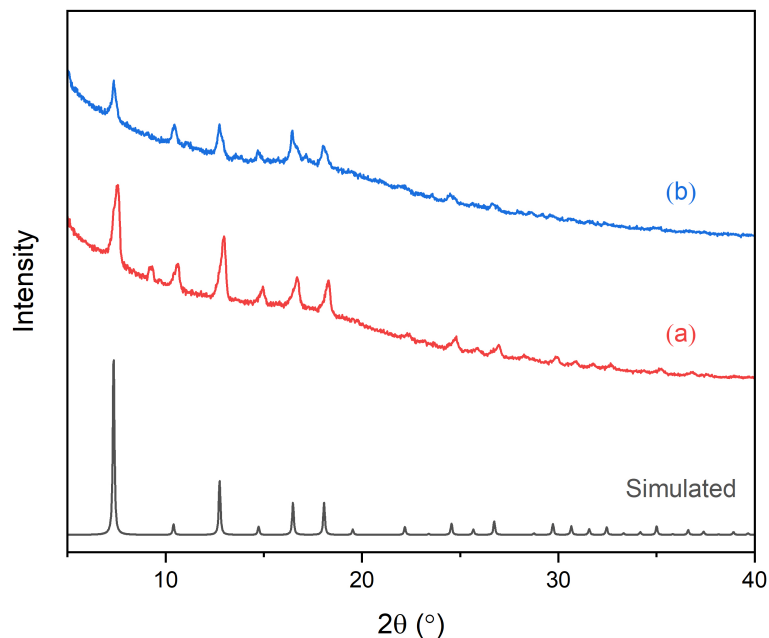

**Figure S13.** PXRD profiles of post-synthesis templates using conditions listed in Table S10.

**Table S11.** Synthesis condition optimization for ZIF-67 nano-structures using PCTE templates with 10 nm pore sizes. 2-MIM: 2-Methylimidazole.  $\text{Co}(\text{NO}_3)_2$  is the  $\text{Co}^{2+}$  source.

| <i>Attempts</i> | <i>[Co<sup>2+</sup>] Conc. (M)</i> | <i>[2-MIM] Conc. (M)</i> | <i>Reaction Time (h)</i> |
|-----------------|------------------------------------|--------------------------|--------------------------|
| (a)             | 0.025                              | 1                        | 4                        |
| (b)             | 0.042                              | 1                        | 4                        |
| (c)             | 0.06                               | 1                        | 4                        |
| (d)             | 0.025                              | 2                        | 4                        |
| (e)             | 0.042                              | 2                        | 4                        |
| (f)             | 0.06                               | 2                        | 4                        |



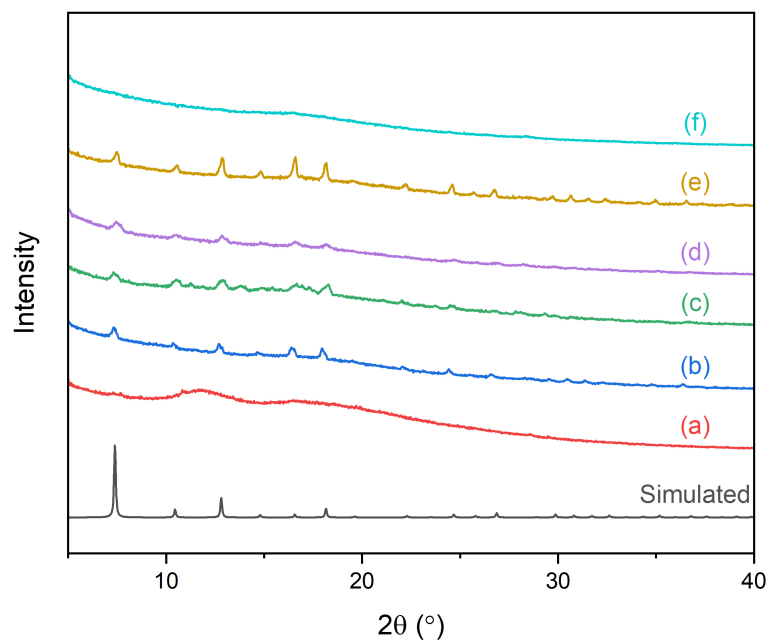

**Figure S14.** PXRD profiles of post-synthesis templates using conditions listed in Table S11.

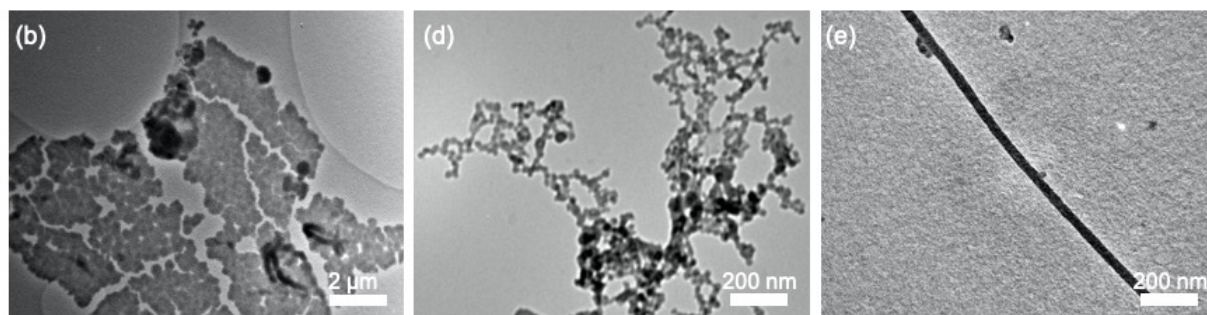

**Figure S15.** TEM images of isolated ZIF-67 10 nm nano-structures from reaction conditions (b), (d), (e) in Table S11.

**Table S12.** Synthesis condition optimization for ZIF-67 nano-structures using PCTE templates with 30 nm pore sizes. 2-MIM: 2-Methylimidazole.  $\text{Co}(\text{NO}_3)_2$  is the  $\text{Co}^{2+}$  source.

| <i>Attempts</i> | <i>[Co<sup>2+</sup>] Conc. (M)</i> | <i>[2-MIM] Conc. (M)</i> | <i>Reaction Time (h)</i> |
|-----------------|------------------------------------|--------------------------|--------------------------|
| (a)             | 0.008                              | 1                        | 1                        |
| (b)             | 0.025                              | 1                        | 1                        |
| (c)             | 0.06                               | 1                        | 1                        |
| (d)             | 0.1                                | 1                        | 1                        |
| (e)             | 0.025                              | 0.5                      | 1                        |
| (f)             | 0.025                              | 0.75                     | 1                        |
| (g)             | 0.025                              | 2                        | 1                        |

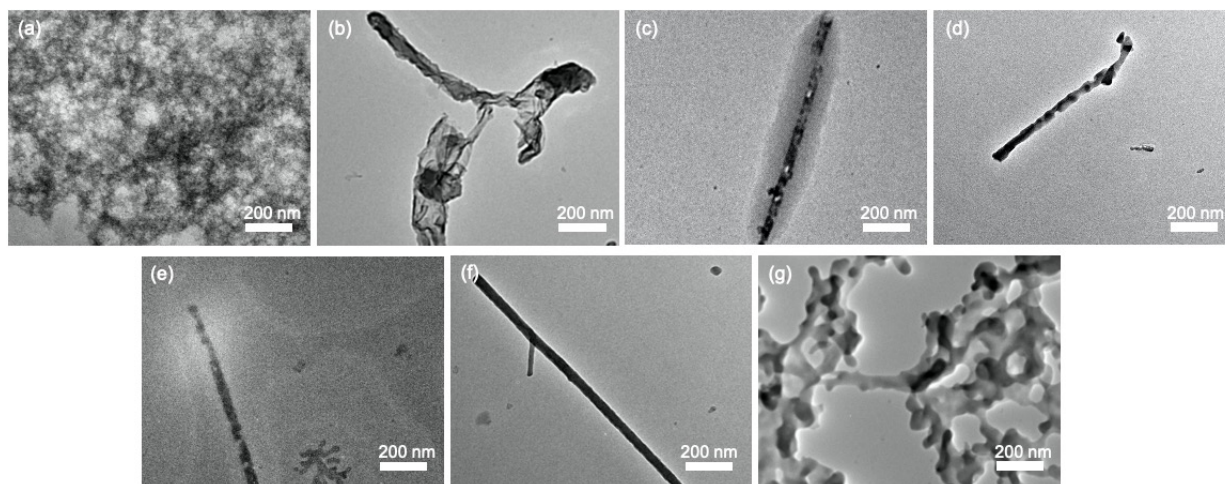

**Figure S16.** TEM images of isolated ZIF-67 30 nm nano-structures from reaction conditions (a)-(g) in Table S12.

**Table S13.** Synthesis condition optimization for ZIF-67 nano-structures using PCTE templates with 100 nm pore sizes. 2-MIM: 2-Methylimidazole.  $\text{Co}(\text{NO}_3)_2$  is the  $\text{Co}^{2+}$  source.

| <i>Attempts</i> | <i>[Co<sup>2+</sup>] Conc. (M)</i> | <i>[2-MIM] Conc. (M)</i> | <i>Reaction Time (h)</i> |
|-----------------|------------------------------------|--------------------------|--------------------------|
| (a)             | 0.025                              | 2                        | 1                        |
| (b)             | 0.042                              | 2                        | 1                        |
| (c)             | 0.06                               | 2                        | 1                        |

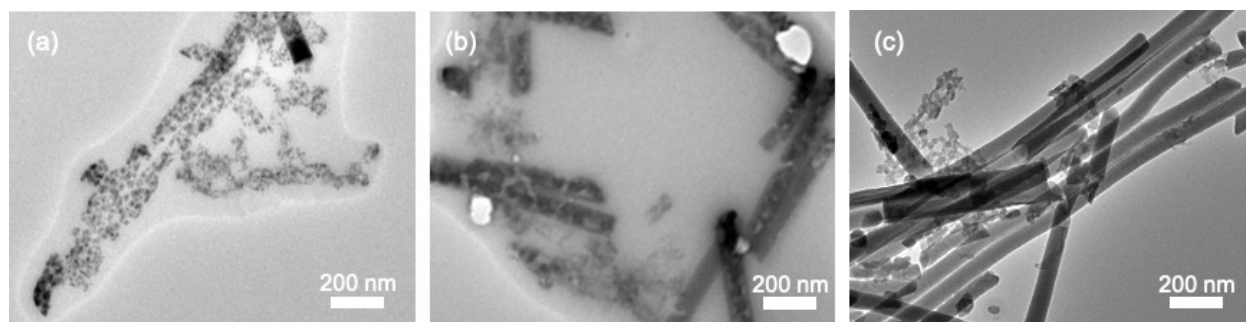

**Figure S17.** TEM images of isolated ZIF-67 100 nm nano-structures from reaction conditions (a)-(c) in Table S13.

**Table S14.** Synthesis condition optimization for ZIF-67 nano-structures using PCTE templates with 200 nm pore sizes. 2-MIM: 2-Methylimidazole.  $\text{Co}(\text{NO}_3)_2$  is the  $\text{Co}^{2+}$  source.

| <i>Attempts</i> | <i>[Co<sup>2+</sup>] Conc. (M)</i> | <i>[2-MIM] Conc. (M)</i> | <i>Reaction Time (h)</i> |
|-----------------|------------------------------------|--------------------------|--------------------------|
| (a)             | 0.025                              | 0.5                      | 1                        |
| (b)             | 0.06                               | 2                        | 1                        |
| (c)             | 0.06                               | 2                        | 4                        |

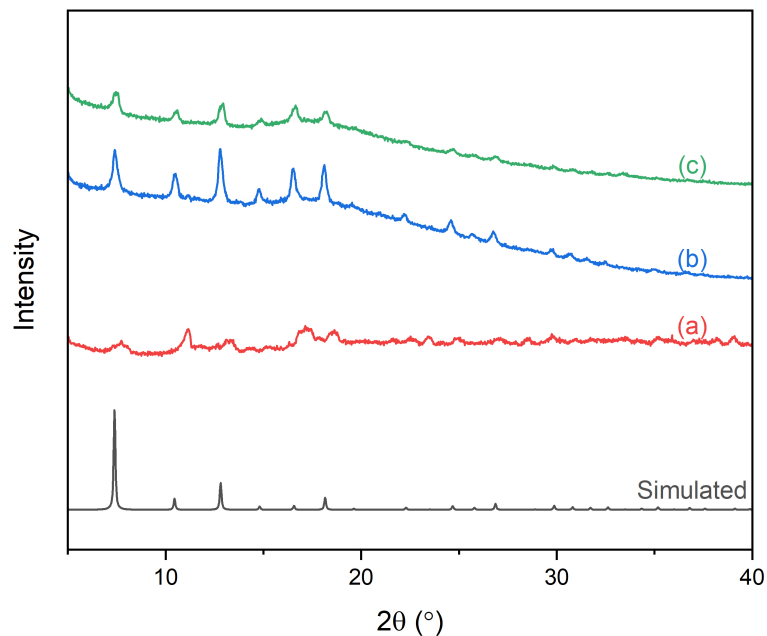

**Figure S18.** PXRD profiles of post-synthesis templates using conditions listed in Table S14.

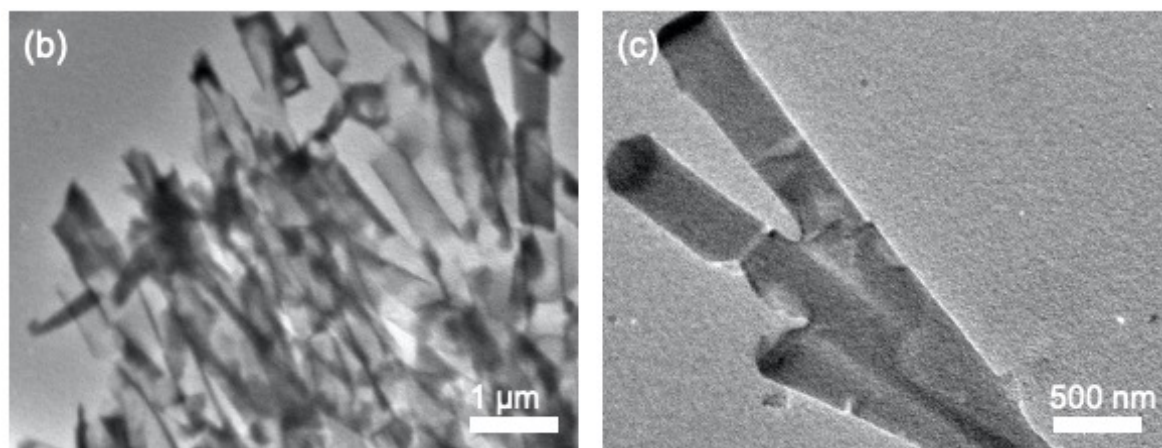

**Figure S19.** TEM images of isolated ZIF-67 200 nm nano-structures from reaction conditions (b)-(c) in Table S14.

**Table S15.** Synthesis condition optimization for ZIF-67 micro-structures using PCTE templates with 10  $\mu\text{m}$  pore sizes. 2-MIM: 2-Methylimidazole.  $\text{Co}(\text{NO}_3)_2$  is the  $\text{Co}^{2+}$  source.

| <i>Attempts</i> | <i>[Co<sup>2+</sup>] Conc.(M)</i> | <i>[2-MIM] Conc. (M)</i> | <i>Reaction Time (h)</i> |
|-----------------|-----------------------------------|--------------------------|--------------------------|
| (a)             | 0.025                             | 1                        | 4                        |
| (b)             | 0.025                             | 1                        | 6                        |
| (c)             | 0.06                              | 1                        | 4                        |
| (d)             | 0.06                              | 1                        | 6                        |
| (e)             | 0.06                              | 2                        | 6                        |

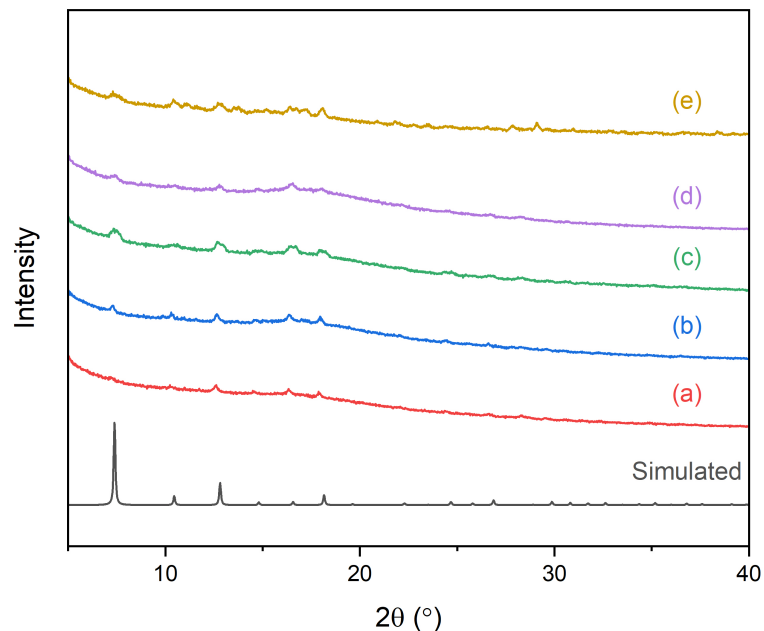

**Figure S20.** PXRD profiles of post-synthesis templates using conditions listed in Table S15.

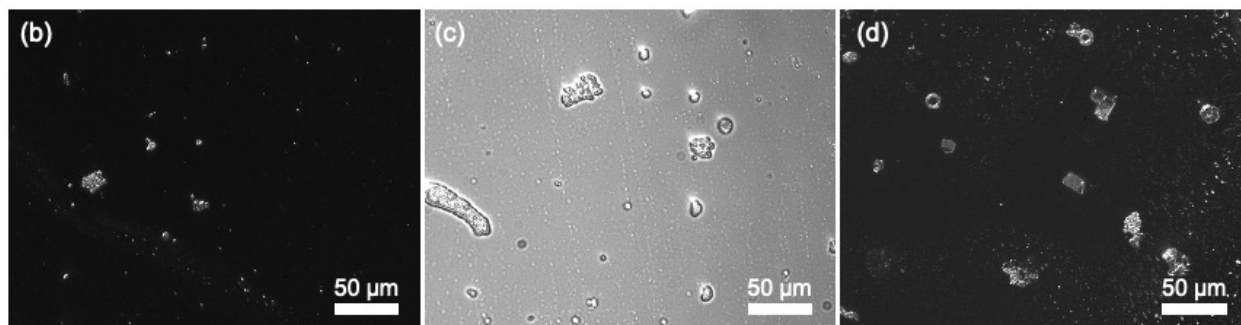

**Figure S21.** Optical microscopy images of isolated ZIF-67 10  $\mu\text{m}$  micro-structures from reaction conditions (b)-(d) in Table S15.

**Table S16.** Synthesis condition optimization for ZIF-67 micro-structures using PCTE templates with 20  $\mu\text{m}$  pore sizes. 2-MIM: 2-Methylimidazole.  $\text{Co}(\text{NO}_3)_2$  is the  $\text{Co}^{2+}$  source.

| <i>Attempts</i> | <i>[Co<sup>2+</sup>] Conc. (M)</i> | <i>[2-MIM] Conc. (M)</i> | <i>Reaction Time (h)</i> |
|-----------------|------------------------------------|--------------------------|--------------------------|
| (a)             | 0.025                              | 2                        | 4                        |
| (b)             | 0.025                              | 2                        | 6                        |
| (c)             | 0.06                               | 2                        | 4                        |
| (d)             | 0.06                               | 2                        | 6                        |
| (e)             | 0.1                                | 2                        | 4                        |
| (f)             | 0.1                                | 2                        | 6                        |

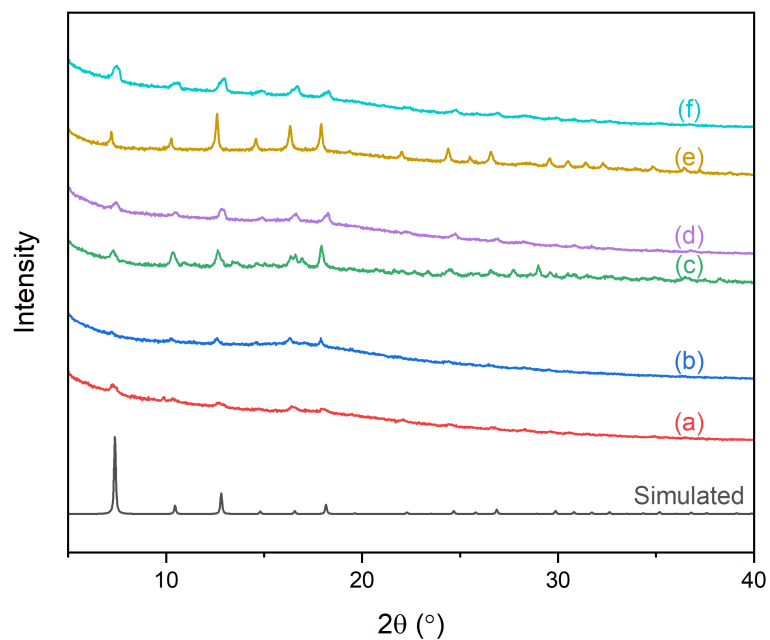

**Figure S22.** PXRD profiles of post-synthesis templates using conditions listed in Table S16.

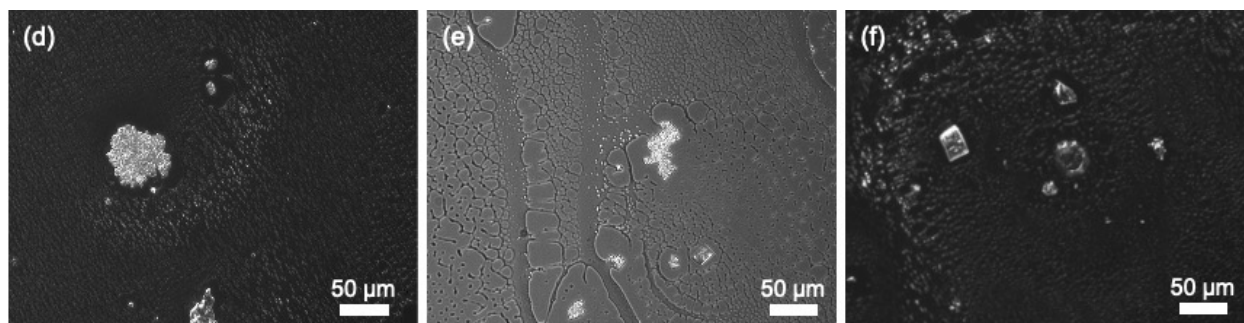

**Figure S23.** Optical microscopy images of isolated ZIF-67 20  $\mu\text{m}$  micro-structures from reaction conditions (d), (e), (f) in Table S16.

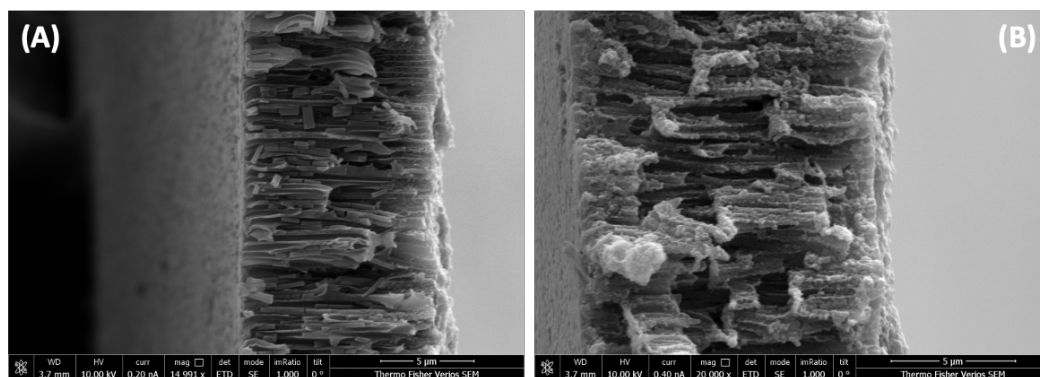

**Figure S24.** Cross-section SEM images of ZIF-8 post-synthesis templates of (A) PCTE and (B) PETE templates of 200 nm pore sizes. Reaction conditions are that optimized for ZIF-8 using 200 nm PCTE templates. Left side facing 1-octanol during synthesis in both images.
